# Supplementary material for: Contribution of TGF-Beta-Mediated NLRP3-HMGB1 Activation to Tubulointerstitial Fibrosis in Rat With Angiotensin II-Induced Chronic Kidney Disease
Source: PubMed Central journal article supplement (PMC7012792; doi:10.3389/fcell.2020.00001), 2020-02-05
Supplement: Data_Sheet_1.pdf [file Data_Sheet_1.pdf]

## Supplementary Figure 1

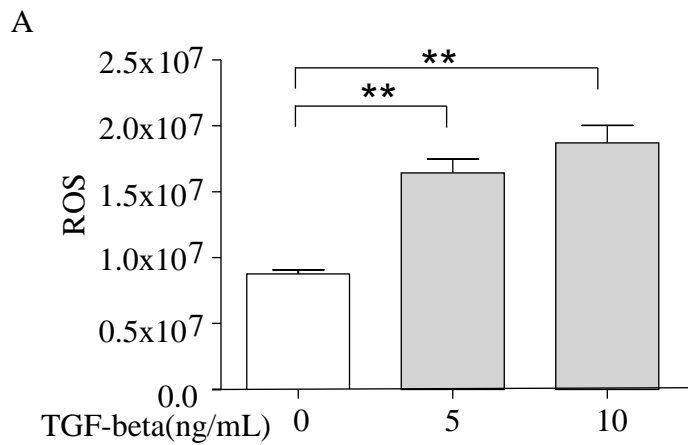

Supplementary Figure 1 TGF-beta increased the level of ROS in NRK-52E cells. summarized data showing the effects of TGF-beta on the level of ROS in 72h (N=6). \*p < 0.05, \*\*p < 0.01 vs. TGF-beta 0ng/ml.

## Supplementary Figure 2

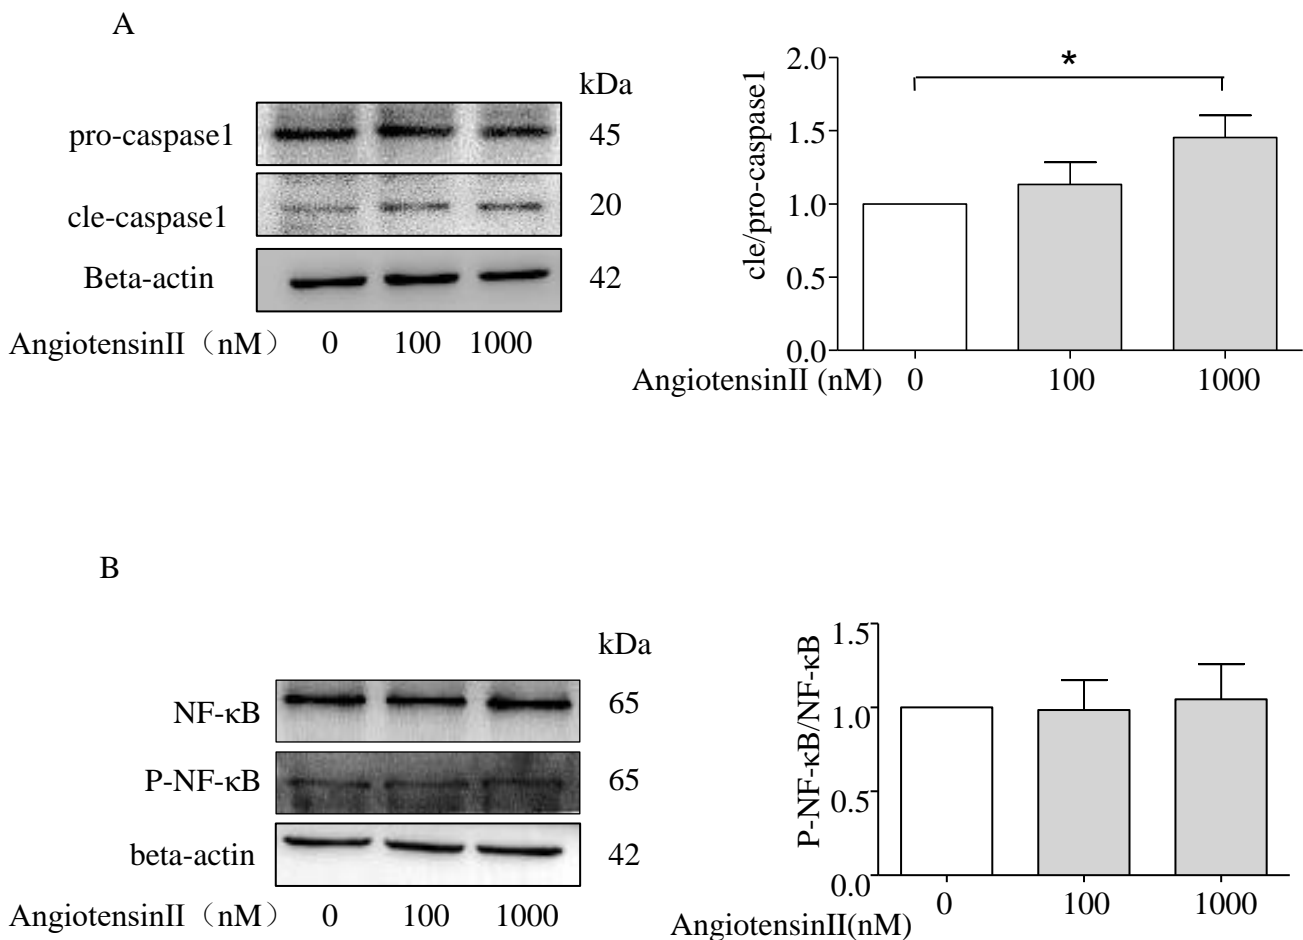

Supplementary Figure 2 the effects of AngiotensinII on NLRP3 inflammasome activation and NLRP3 transcription.(A)Representative Westernblot and summarized data showing the expression of Caspase1,cleave-caspase1 and beta-actin (N=4).\*p < 0.05 vs. AngII 0nM.(B)Representative Westernblot and summarized data showing the expression of NF-κB, p-NF-κB and beta-actin (N=4).
